# Supplementary material for: Multivariate longitudinal data for survival analysis of cardiovascular event prediction in young adults: insights from a comparative explainable study
Source: Springer Nature journal article supplement (doi:10.1186/s12874-023-01845-4), 2023-01-25
Supplement: MOESM1 [file 23953536]

# SUPPLEMENTARY MATERIALS

## Multivariate longitudinal data for survival analysis of cardiovascular event prediction in young adults: insights from a comparative explainable study

### List of supplementary figures and tables

**Table S1.** A list of the variables that were used for prediction in this study

**Fig. S1:** cumulative incidence of CVD after Y15 and Y5

**Fig. S2:** cohort selection flowchart

**Fig. S3:** performance among 23 clustering criteria to select the optimal cluster assignment for the trajectory clustering strategy

**Fig. S4:** Time-varying AUC on the test set using Dynamic-DeepHit for dynamic prediction on all participants in CARDIA.

**Table S2:** Model performance in additional metrics at the last evaluation time point

**Fig. S5:** Model performance over time when limiting the input variables to 9 traditional ASCVD risk factors

**Fig S6:** heatmap showing variable importance for the RSF model trained on concatenated data

**Table S3:** Race-specific model predictive performance for the top longitudinal modeling strategies

**Fig. S7:** Explanation for race-specific models of RSF trained on trajectory clustering data.

### Outcome ascertainment

The CARDIA study outcomes ascertainment protocols have been described in detail elsewhere [1]. For this study, the first CVD event was used as the endpoint [2, 3]. We recorded new cardiovascular and cerebrovascular events from the baseline examination through August 2018. During their scheduled study examinations and yearly telephone interviews, each participant or designated proxy was asked about interim hospital admissions, outpatient procedures, and deaths. Designated proxies do not participate in the examination. Medical records were requested for participants who had been hospitalized or received an outpatient revascularization procedure. Vital status was assessed every 6 months; medical and other death records were requested after consent had been obtained from the next of kin. Two physician members of the Committee independently reviewed medical records and recorded information to adjudicate each possible cardiovascular or cerebrovascular event or underlying cause of death using specific definitions and a detailed manual of operations (available online: <http://www.cardia.dopm.uab.edu>). If disagreement occurred between the primary reviewers, the case was reviewed by the full committee. The primary composite outcome was incident CVD, which included coronary heart disease (CHD – myocardial infarction, acute coronary syndrome, or CHD death, including fatal myocardial infarction), stroke, transient ischemic attack (TIA), hospitalization for heart failure, intervention for peripheral arterial disease, or death from cardiovascular causes. Secondary cause-specific outcomes included stroke/TIA, CHD, and CVD mortality. Participants who died from a non-CVD cause were censored in the survival models at time of death.

### Temporal Importance Model Explanation (TIME)

Here, we briefly summarize the algorithm of TIME in layman's terms, for a more detailed technical version please refer to [4]. The underlying working of TIME is its permutation approach.

A typical way of permutation in tabular format is to replace the value of feature  $j$  in participant  $i$  with another value of  $j$  in another participant, then compute the difference between the permuted and baseline losses. The baseline loss is the difference between the model output and the target outcome  $y_i$ , and the permuted loss is the difference between the model output using the permuted input and the target outcome  $y_j$ . If the permuted loss is significantly greater than the baseline loss

on average over many permutations, the feature is deemed important. For the case of longitudinal data however, the typical permutation would be simply replacing the value of feature  $j$  at time  $t$  in participant  $i$  with another value of  $j$  at time  $t$  in another participant. Doing this would break the temporal dependencies and correlations within the trajectory as noted above. To alleviate this problem, TIME performs joint permutation, which means (1) replacing values of feature  $j$  from a time window in participant  $i$  with the values in another participant of the same time window, instead of individual time points, and (2) replacing the value of feature  $j$  from time  $k_1$  with that of feature  $j$  from time  $k_2$ , from the same participant, which enables ordering importance.

As for the time window, TIME searches for the most important time windows  $W^* = [k_1, k_2]$  ( $1 \leq k_1 < k_2 \leq L$ ) that most of the effect of permuting lies in  $W^*$  ( $L$  is the length of time series, in this work is 6). TIME does this by searching for the largest possible prior window  $W_P = [1, k_1]$  and subsequent window  $W_S = [k_2, L]$ . TIME initializes  $W_P$  to be the first half and  $W_S$  be the latter half of the series, then perturb  $W_P$  and  $W_S$  and observe their importance scores. If the importance score for  $W_P$  is high, it likely that  $W_P$  contains important time steps, the search algorithm will shorten the  $W_P$  to exclude the important time steps, and if the importance score for  $W_P$  is low,  $W_P$  will then be expanded until its importance score is greater than a threshold. This threshold of importance is determined from a user-input localization parameter that specifies the level of importance that the importance window should hold (for example, 90% of the total importance of the whole series). Similar logic is applied to find the subsequent window  $W_S$ , and the important window  $W^*$  is what in between  $W_P$  and  $W_S$ .

Another attractive feature of TIME is using hypothesis testing with correction for multiple comparisons, using the permutation test [5] to ascertain importance at three levels: overall (global), window, and ordering within the window, for each longitudinal variable. TIME uses a hierarchical false discovery rate control method [6] to address the issue of multiple comparisons in hypothesis testing.

## References:

1. Friedman GD, Cutter GR, Donahue RP, Hughes GH, Hulley SB, Jacobs DR, Liu K, Savage PJ. Cardia: study design, recruitment, and some characteristics of the examined participants. *J Clin Epidemiol.* 1988;41:1105–1116.
2. Loria CM, Liu K, Lewis CE, Hulley SB, Sidney S, Schreiner PJ, Williams OD, Bild DE, Detrano R. Early Adult Risk Factor Levels and Subsequent Coronary Artery Calcification The CARDIA Study. *J Am Coll Cardiol.* 2007;49:2013–2020.
3. Gardin JM, Wagenknecht LE, Anton-Culver H, Flack J, Gidding S, Kurosaki T, Wong ND, Manolio TA. Relationship of Cardiovascular Risk Factors to Echocardiographic Left Ventricular Mass in Healthy Young Black and White Adult Men and Women: The CARDIA Study. *Circulation.* 1995;92:380–387.
4. Sood, A., and Craven, M. Feature Importance Explanations for Temporal Black-Box Models. *arXiv preprint arXiv:2102.11934.* 2021.
5. Ojala, M. and Garriga, G. C. Permutation Tests for Studying Classifier Performance. *Journal of Machine Learning Research.* 2010:1833–1863.
6. Yekutieli, D. Hierarchical False Discovery Rate–Controlling Methodology. *Journal of the American Statistical Association.* 2008; 103(481):309–316.

**Table S1.** A list of the variables that were used for prediction in this study. A total of 35 variables/predictors were used, three of which were fixed variables and in *italic*, the rest were longitudinal (repeating) variables that were repeatedly measured in most (if not all) exams in most participants.

| Category          | Variable name                                               | Variable description                                                                                                                                   |
|-------------------|-------------------------------------------------------------|--------------------------------------------------------------------------------------------------------------------------------------------------------|
| Demographics      | <i>AGE, MALE, RACE</i>                                      | Age, male or not, race: African-American or White                                                                                                      |
| Socioeconomic     | ED, DFPAY                                                   | Education, ability to pay for the basics                                                                                                               |
| Body measures     | BMI, ARMCI, WGT, WST                                        | BMI, arm circumference, weight, waist girth                                                                                                            |
| Medical history   | ASMA, CANCR, DIAB, GALL, KIDNY, NPREG, LIVER, MENTL, PHRTAK | Asthma, cancer, diabetes, gallbladder problem, kidney problem, number of pregnancies, liver problem, mental disorder, parent's history of heart attack |
| Alcohol use       | BEER, LIQR, WINE                                            | Number of drinks of beer/hard liquor/wine per week                                                                                                     |
| Smoking           | SMKNW, CGTDY                                                | Still smoking regularly ( $\geq 5$ times/week), number of cigarettes/day                                                                               |
| Heart measures    | DBP, SBP, PULSE, HBM                                        | Diastolic blood pressure, systolic blood pressure, pulse, taking anti-hypertensive medication                                                          |
| Lipids            | CHOL, CHNOW, HDL, LDL, NTRIG                                | Total cholesterol, taking cholesterol medication, high-density cholesterol, low-density cholesterol, triglycerides                                     |
| Glucose           | GLU                                                         | Fasting glucose                                                                                                                                        |
| Marijuana use     | LIFE                                                        | Number of times taking marijuana in life                                                                                                               |
| Physical activity | PSTYR                                                       | Reported participation in 13 physical activities                                                                                                       |

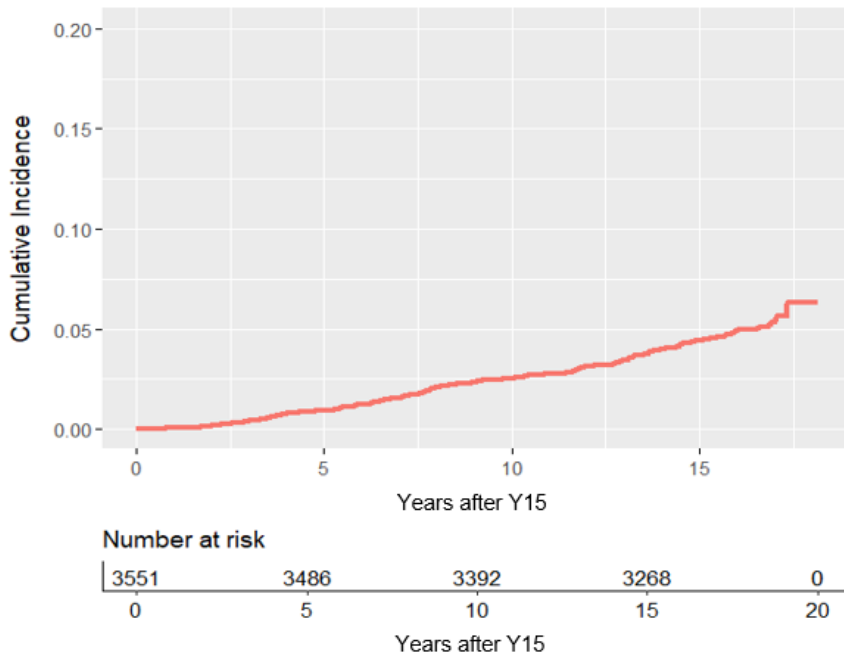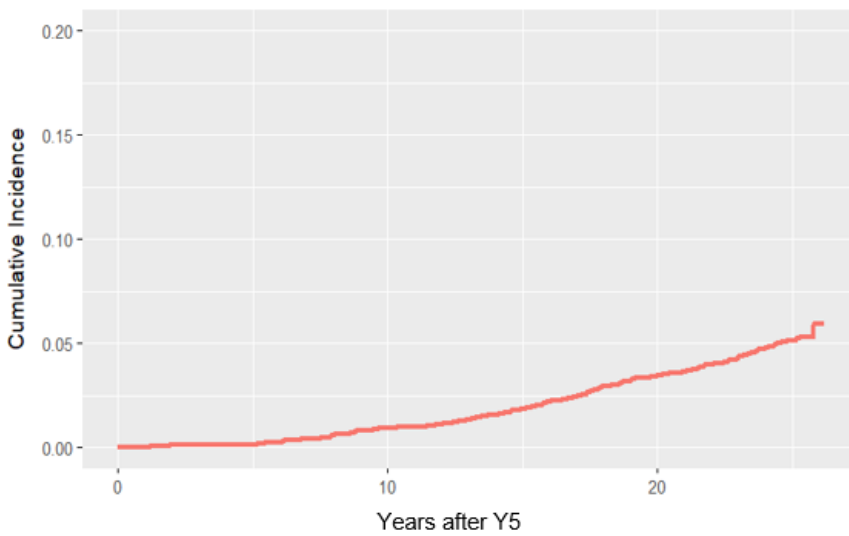

**Fig. S1:** cumulative incidence of CVD after Y15 (top) and Y5 (bottom). The cumulative incidence could range from 0 to 1 (max). Few incidents happened before Y15, as the curve is relatively flat (very few incidents) before Y15 Exam (10 Years after Y5 Exam). After Y15, the incidence rate is roughly linear.

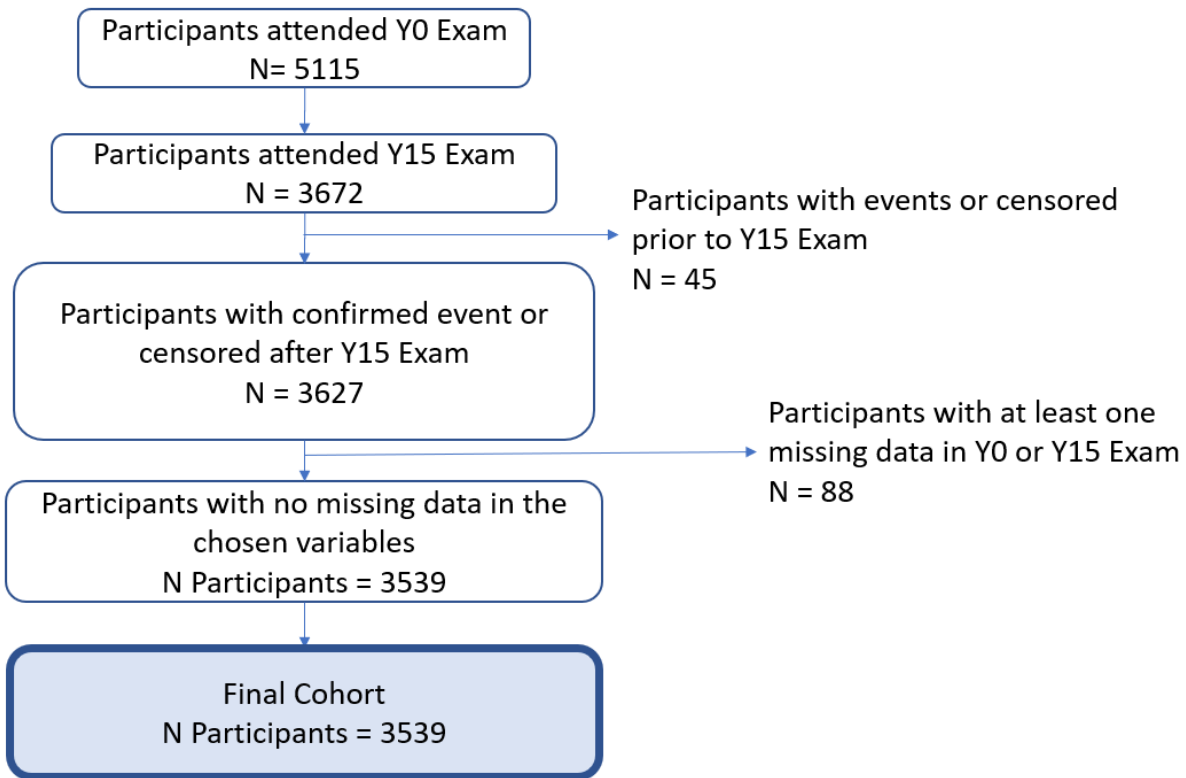

**Fig. S2:** cohort selection flowchart

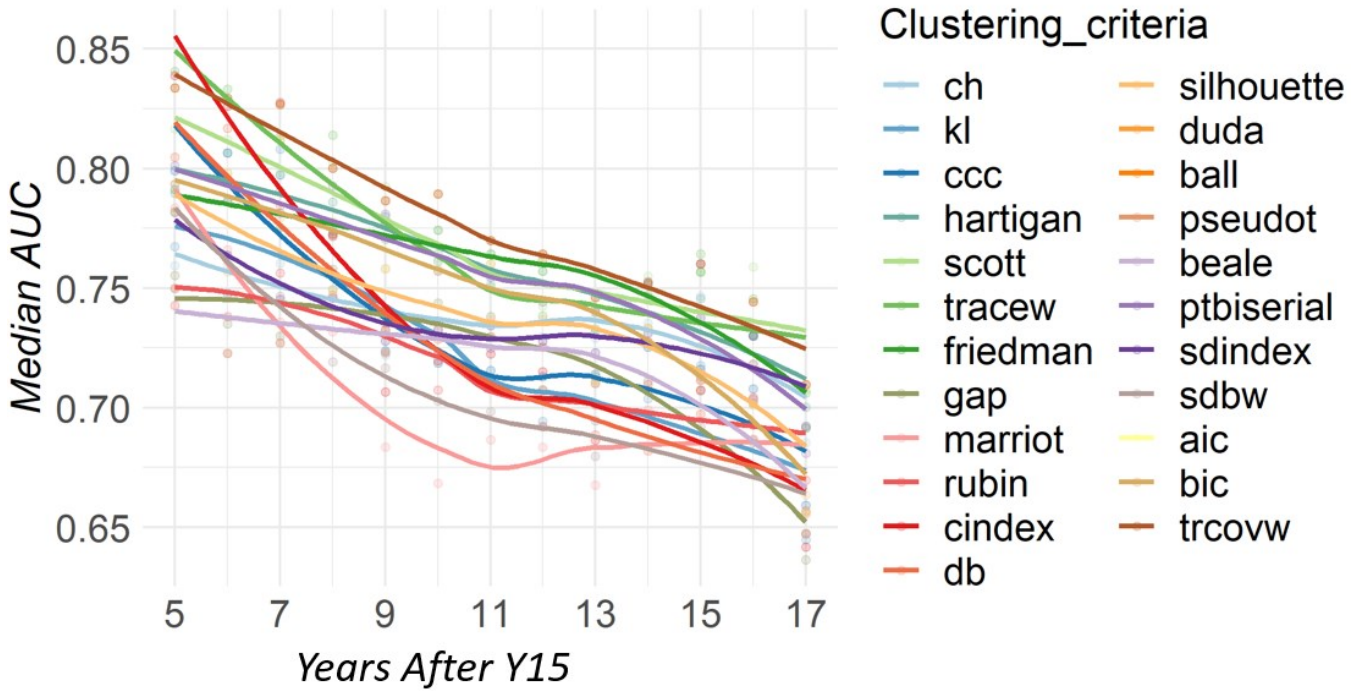

**Fig. S3:** performance among 23 clustering criteria to select the optimal cluster assignment for the trajectory clustering strategy. The best criterion is 'trcovw' method (in brown), standing for trace (or sum of diagonal elements) of the within-cluster pooled covariance matrix.

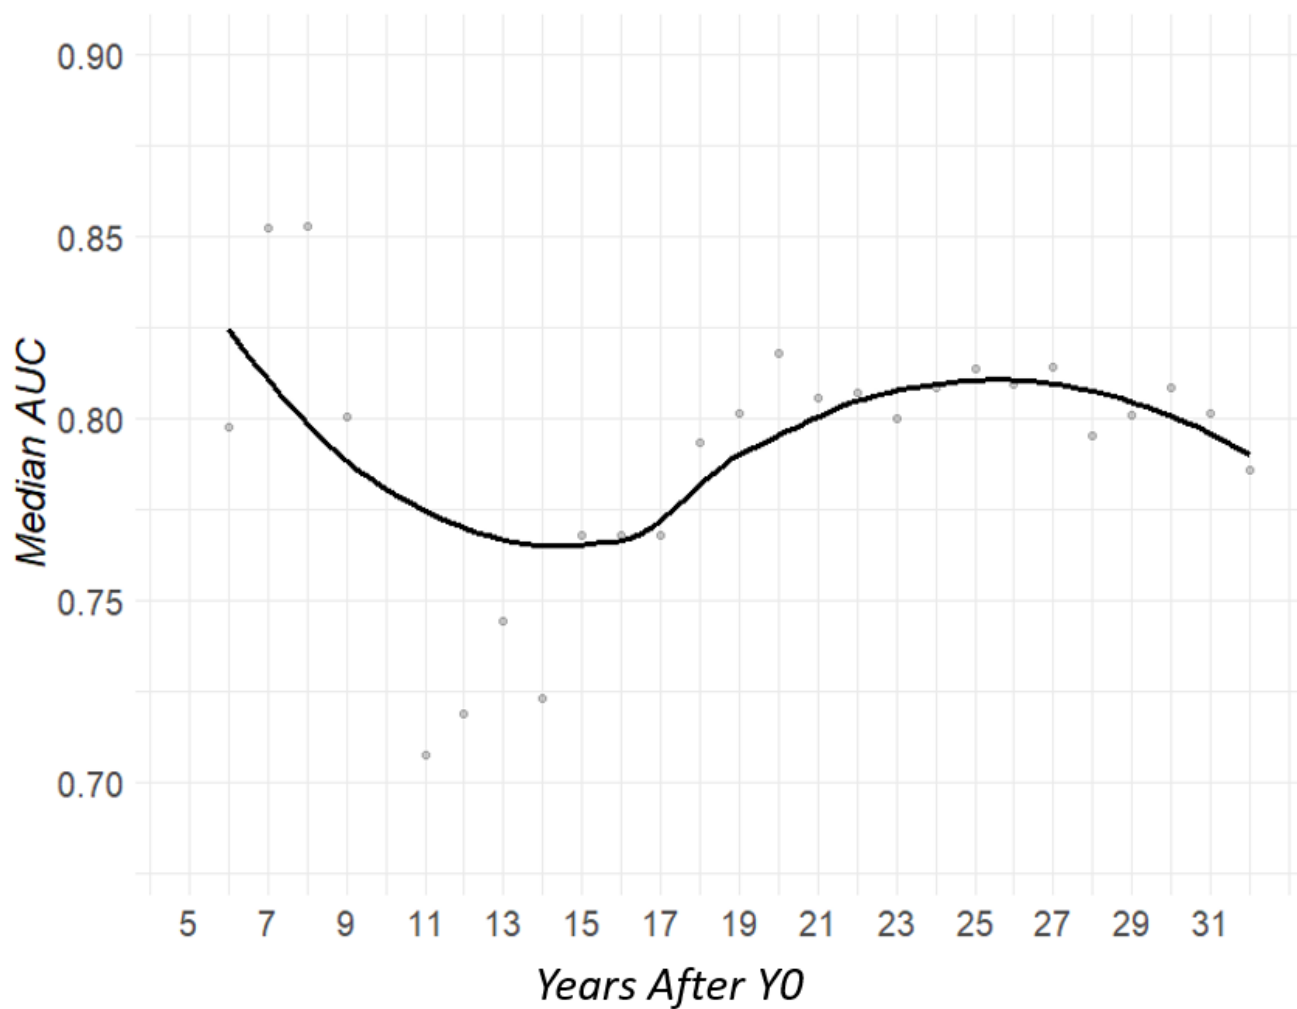

**Fig. S4:** Time-varying AUC on the test set using Dynamic-DeepHit for dynamic prediction on all participants in CARDIA. The model was trained and validated using 5-fold x 2 times cross-validation. AUC before Y15 is unstable because of the low CVD incidence before Y15.

**Table S2:** Model performance in additional metrics at the last evaluation time point (17 years after Y15). The binary cutoff threshold is determined by the point on the AUROC curve that maximizes F1 score. Bolded values indicate the highest value in the column.

| Strategy                                    | Model                              | Post-10 years iAUC                    | Brier                                 | Sensitivity                           | Specificity                          | PPV                                   | NPV                                   | F1                                    | MCC                                   |
|---------------------------------------------|------------------------------------|---------------------------------------|---------------------------------------|---------------------------------------|--------------------------------------|---------------------------------------|---------------------------------------|---------------------------------------|---------------------------------------|
| Time-series (TS) massive feature extraction | RSF on TS-extracted features       | <b>0.792</b><br><b>(0.773, 0.811)</b> | <b>0.042</b><br><b>(0.041, 0.043)</b> | <b>0.779</b><br><b>(0.715, 0.842)</b> | 0.653<br>(0.578, 0.724)              | <b>0.118</b><br><b>(0.093, 0.137)</b> | <b>0.982</b><br><b>(0.979, 0.986)</b> | 0.202<br>(0.169, 0.228)               | 0.208<br>(0.175, 0.237)               |
|                                             | LASSO-Cox on TS-extracted features | 0.733 (0.7, 0.771)                    | 0.045<br>(0.044, 0.047)               | 0.678<br>(0.616, 0.741)               | 0.673<br>(0.612, 0.735)              | 0.110<br>(0.094, 0.124)               | 0.974<br>(0.971, 0.978)               | 0.187<br>(0.166, 0.207)               | 0.171<br>(0.145, 0.196)               |
| Recurrent neural network                    | Dynamic-DeepHit                    | 0.785<br>(0.756, 0.813)               | 0.047<br>(0.046, 0.048)               | 0.765<br>(0.698, 0.846)               | 0.676<br>(0.603, 0.761)              | 0.122<br>(0.107, 0.140)               | 0.982<br>(0.978, 0.986)               | <b>0.208</b><br><b>(0.187, 0.234)</b> | <b>0.214</b><br><b>(0.186, 0.246)</b> |
| Trajectory clustering                       | RSF on trajectory clustering data  | 0.778<br>(0.760, 0.796)               | 0.043<br>(0.042, 0.044)               | 0.758<br>(0.697, 0.832)               | 0.611<br>(0.546, 0.665)              | 0.101<br>(0.087, 0.112)               | 0.977<br>(0.974, 0.98)                | 0.176<br>(0.159, 0.191)               | 0.979<br>(0.976, 0.983)               |
| Data concatenation                          | RSF on concatenated data           | 0.779<br>(0.761, 0.798)               | 0.043<br>(0.042, 0.044)               | 0.783<br>(0.736, 0.824)               | 0.635<br>(0.57, 0.697)               | 0.112<br>(0.095, 0.127)               | 0.982<br>(0.978, 0.985)               | 0.194<br>(0.17, 0.216)                | 0.197<br>(0.168, 0.227)               |
| Joint modeling                              | JMBayes                            |                                       |                                       | Did not converge                      |                                      |                                       |                                       |                                       |                                       |
| Last observed values                        | RSF on Y15 Data                    | 0.765<br>(0.74, 0.79)                 | 0.043<br>(0.042, 0.044)               | 0.684<br>(0.638, 0.73)                | <b>0.699</b><br><b>(0.651, 0.75)</b> | 0.116<br>(0.103, 0.129)               | 0.976<br>(0.973, 0.978)               | 0.196<br>(0.178, 0.215)               | 0.187<br>(0.164, 0.209)               |
|                                             | Cox on Y15 Data                    | 0.761<br>(0.738, 0.788)               | 0.043<br>(0.042, 0.045)               | 0.656<br>(0.587, 0.732)               | 0.722<br>(0.663, 0.777)              | 0.125<br>(0.099, 0.144)               | 0.975<br>(0.971, 0.979)               | 0.203<br>(0.179, 0.225)               | 0.191<br>(0.168, 0.219)               |
|                                             | LASSO-Cox on Y15 Data              | 0.762<br>(0.752, 0.802)               | 0.044<br>(0.043, 0.045)               | 0.698<br>(0.65, 0.749)                | 0.685<br>(0.642, 0.726)              | 0.114<br>(0.102, 0.126)               | 0.976<br>(0.972, 0.98)                | 0.195<br>(0.178, 0.211)               | 0.186<br>(0.164, 0.206)               |
| Reference (Y0 data)                         | RSF on Y0 Data                     | 0.737<br>(0.71, 0.762)                | 0.044<br>(0.044, 0.045)               | 0.662<br>(0.592, 0.729)               | 0.669<br>(0.631, 0.713)              | 0.100<br>(0.094, 0.106)               | 0.974<br>(0.969, 0.978)               | 0.173<br>(0.163, 0.183)               | 0.156<br>(0.137, 0.176)               |
|                                             | Cox on Y0 Data                     | 0.738<br>(0.711, 0.764)               | 0.045<br>(0.044, 0.046)               | 0.696<br>(0.608, 0.784)               | 0.635<br>(0.552, 0.724)              | 0.102<br>(0.084, 0.115)               | 0.976<br>(0.971, 0.98)                | 0.174<br>(0.154, 0.19)                | 0.16<br>(0.141, 0.177)                |
|                                             | LASSO-Cox on Y0 Data               | 0.729<br>(0.704, 0.757)               | 0.045<br>(0.044, 0.046)               | 0.629<br>(0.569, 0.692)               | 0.688<br>(0.632, 0.756)              | 0.104<br>(0.095, 0.113)               | 0.972<br>(0.97, 0.974)                | 0.176<br>(0.165, 0.189)               | 0.154<br>(0.139, 0.171)               |

iAUC: integrated AUC; PPV: Positive Predictive Value; NPV: Negative Predictive Value; MCC: Matthew Correlation Coefficient



### Performance of Model Trained on ASCVD Variables

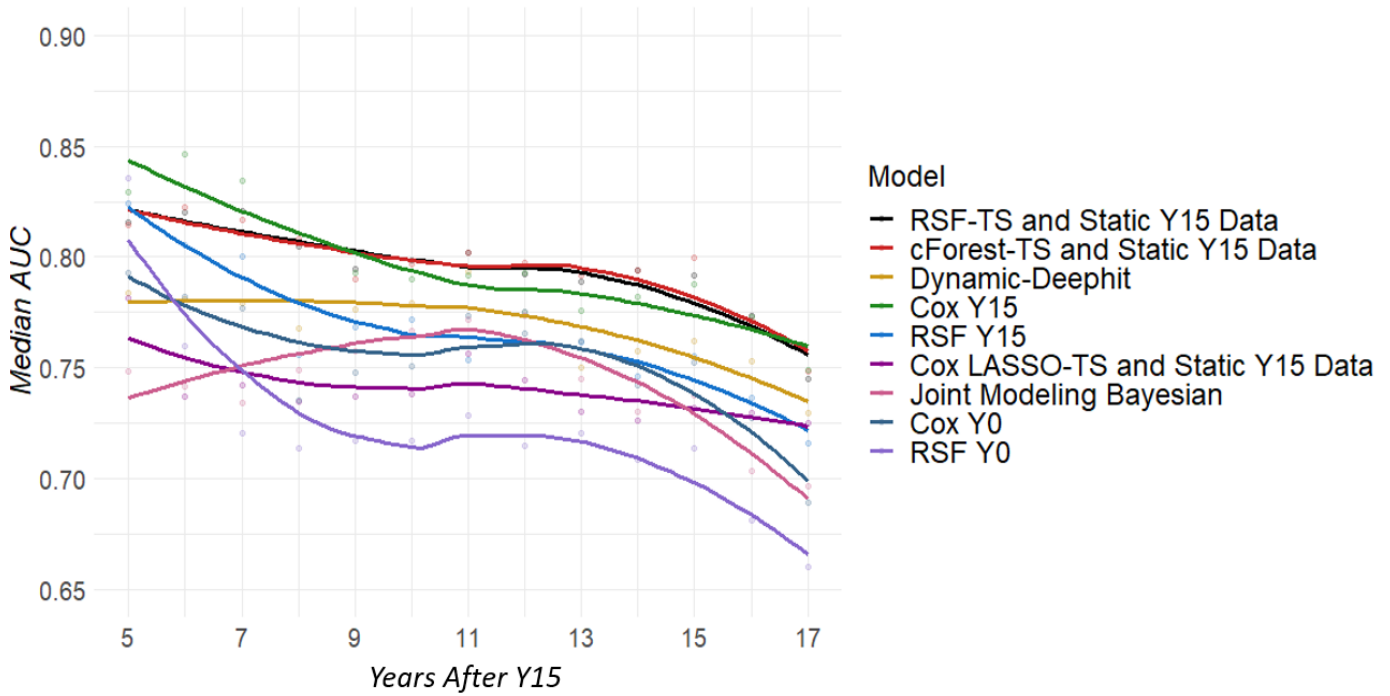

**Fig. S5:** Model performance over time when limiting the input variables to 9 traditional ASCVD risk factors (Age, gender, race, SBP, cholesterol, HDL, smoking status, diabetes status, and taking high-blood pressure medication status).

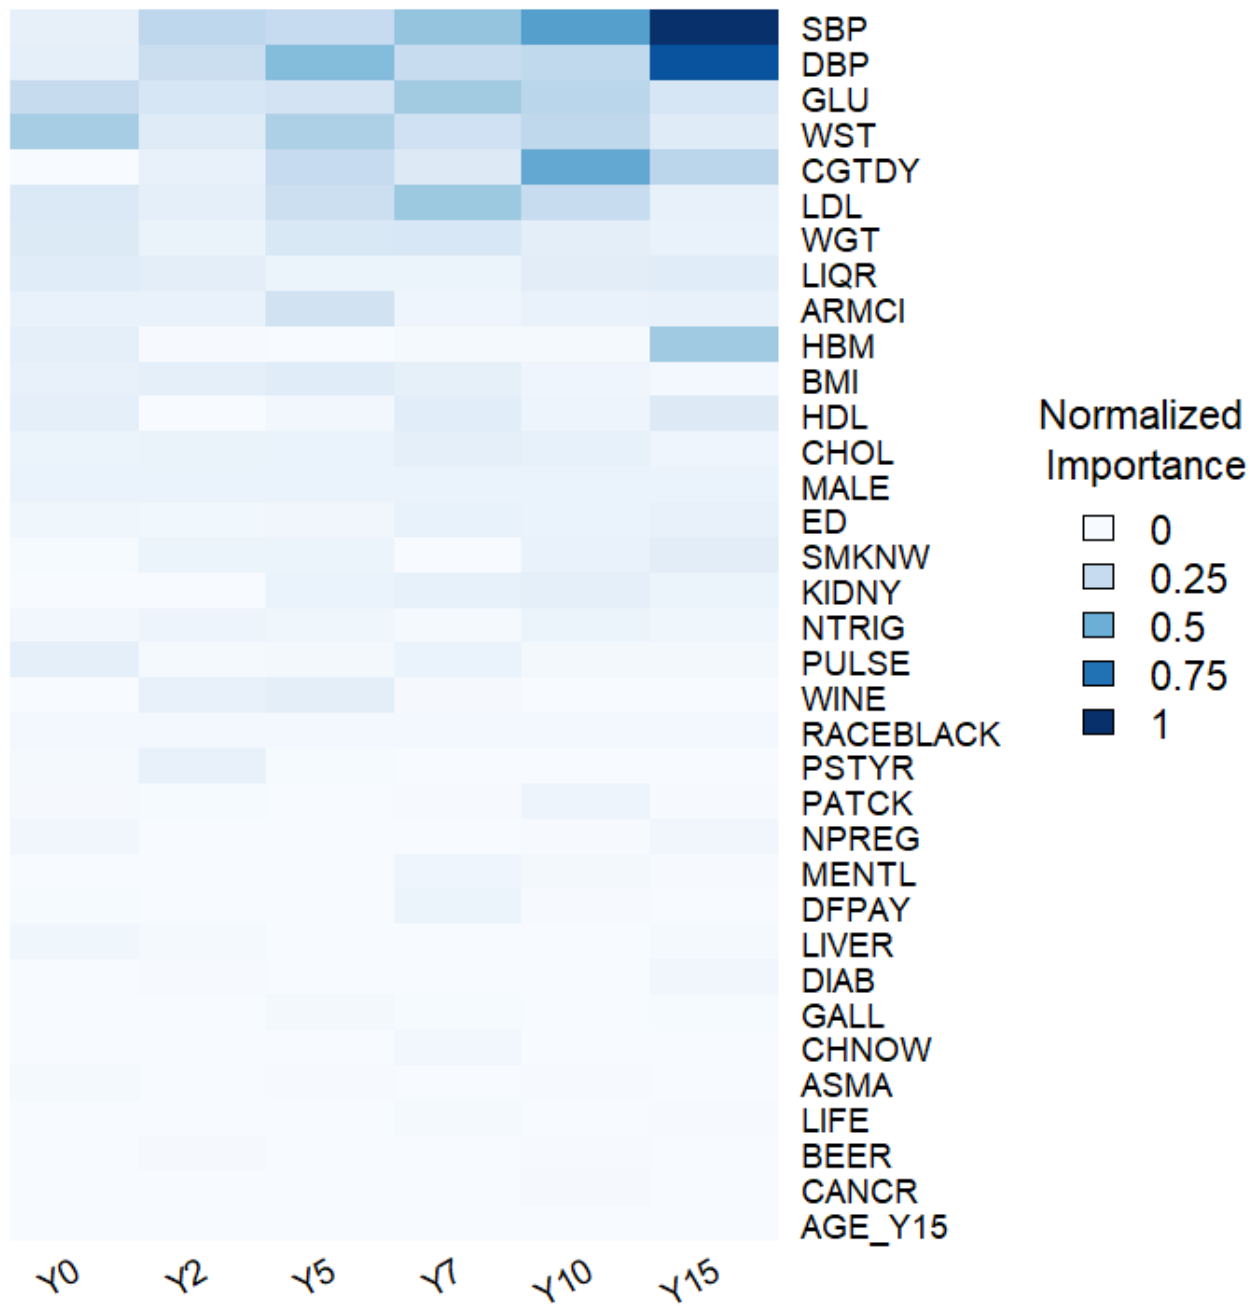

**Fig. S6:** heatmap showing variable importance for the RSF model trained on concatenated data. Repeated measures (e.g., SBP-Y0, SBP-Y2, SBP-Y5) were treated as independent input variables. RSF-VIMP was used to get the variable importance score for each input variable. All variable importance scores were then normalized between 0-1 and plotted as the z-axis on the heatmap. Variables were ordered along the y-axis based on the averaged importance score across all time points.

**Table S3:** Race-specific model predictive performance for the top longitudinal modeling strategies (mean and 95% empirical bootstrap interval)

| Strategy                                       | Model                                          | iAUC                    | Post-10 years iAUC      | C-index                 | Last AUC                | Brier                   | Sensitivity             | Specificity             | PPV                     | NPV                     | F1                      | MCC                     |
|------------------------------------------------|------------------------------------------------|-------------------------|-------------------------|-------------------------|-------------------------|-------------------------|-------------------------|-------------------------|-------------------------|-------------------------|-------------------------|-------------------------|
| Time-series (TS) summary statistics extraction | RSF-TS Black only                              | 0.797<br>(0.776, 0.816) | 0.774<br>(0.754, 0.791) | 0.760<br>(0.747, 0.777) | 0.763<br>(0.745, 0.779) | 0.056<br>(0.053, 0.058) | 0.695<br>(0.61, 0.792)  | 0.728<br>(0.648, 0.803) | 0.182<br>(0.138, 0.218) | 0.973<br>(0.968, 0.977) | 0.271<br>(0.239, 0.3)   | 0.25<br>(0.225, 0.274)  |
|                                                | RSF-TS White only                              | 0.790<br>(0.766, 0.818) | 0.779<br>(0.754, 0.806) | 0.765<br>(0.73, 0.798)  | 0.74<br>(0.698, 0.779)  | 0.031<br>(0.029, 0.033) | 0.747<br>(0.671, 0.845) | 0.644<br>(0.56, 0.727)  | 0.086<br>(0.073, 0.099) | 0.985<br>(0.982, 0.989) | 0.152<br>(0.131, 0.172) | 0.166<br>(0.139, 0.19)  |
| Trajectory clustering                          | RSF on trajectory clustering data – Black only | 0.746<br>(0.715, 0.777) | 0.738<br>(0.717, 0.761) | 0.71<br>(0.686, 0.733)  | 0.717<br>(0.696, 0.735) | 0.058<br>(0.056, 0.059) | 0.767<br>(0.708, 0.841) | 0.58<br>(0.511, 0.648)  | 0.12<br>(0.107, 0.132)  | 0.973<br>(0.969, 0.978) | 0.206<br>(0.187, 0.223) | 0.18<br>(0.157, 0.2)    |
|                                                | RSF on trajectory clustering data – White only | 0.783<br>(0.748, 0.82)  | 0.750<br>(0.698, 0.804) | 0.732<br>(0.692, 0.779) | 0.719<br>(0.676, 0.764) | 0.031<br>(0.03, 0.034)  | 0.671<br>(0.585, 0.763) | 0.699<br>(0.639, 0.758) | 0.089<br>(0.073, 0.104) | 0.982<br>(0.978, 0.986) | 0.156<br>(0.131, 0.18)  | 0.161<br>(0.127, 0.198) |
| Data concatenation                             | RSF on concatenated data – Black only          | 0.790<br>(0.756, 0.825) | 0.772<br>(0.745, 0.798) | 0.749<br>(0.727, 0.771) | 0.756<br>(0.732, 0.781) | 0.056<br>(0.055, 0.058) | 0.619<br>(0.548, 0.693) | 0.792<br>(0.738, 0.864) | 0.193<br>(0.165, 0.222) | 0.967<br>(0.963, 0.971) | 0.286<br>(0.258, 0.319) | 0.255<br>(0.224, 0.289) |
|                                                | RSF on concatenated data – White only          | 0.792<br>(0.749, 0.834) | 0.784<br>(0.737, 0.834) | 0.764<br>(0.714, 0.813) | 0.749<br>(0.693, 0.802) | 0.031<br>(0.029, 0.033) | 0.727<br>(0.639, 0.822) | 0.713<br>(0.642, 0.791) | 0.105<br>(0.08, 0.127)  | 0.985<br>(0.981, 0.989) | 0.18<br>(0.143, 0.214)  | 0.197<br>(0.153, 0.238) |
| Last observed values                           | RSF on Y15 data – Black only                   | 0.776<br>(0.742, 0.813) | 0.750<br>(0.721, 0.778) | 0.732<br>(0.715, 0.75)  | 0.737<br>(0.718, 0.757) | 0.056<br>(0.054, 0.058) | 0.666<br>(0.604, 0.731) | 0.728<br>(0.694, 0.765) | 0.151<br>(0.138, 0.165) | 0.969<br>(0.964, 0.973) | 0.245<br>(0.226, 0.264) | 0.217<br>(0.192, 0.241) |
|                                                | RSF on Y15 data – White only                   | 0.783<br>(0.75, 0.824)  | 0.752<br>(0.709, 0.809) | 0.739<br>(0.702, 0.778) | 0.729<br>(0.69, 0.77)   | 0.031<br>(0.029, 0.033) | 0.628<br>(0.572, 0.689) | 0.76<br>(0.685, 0.843)  | 0.121<br>(0.085, 0.155) | 0.981<br>(0.979, 0.982) | 0.194<br>(0.147, 0.239) | 0.195<br>(0.147, 0.239) |

### Black participants

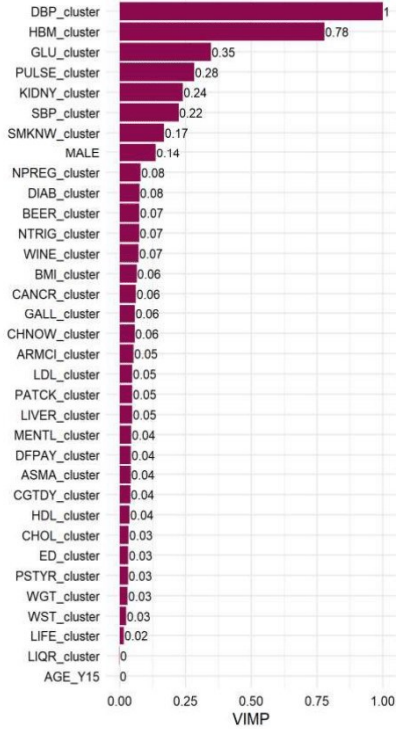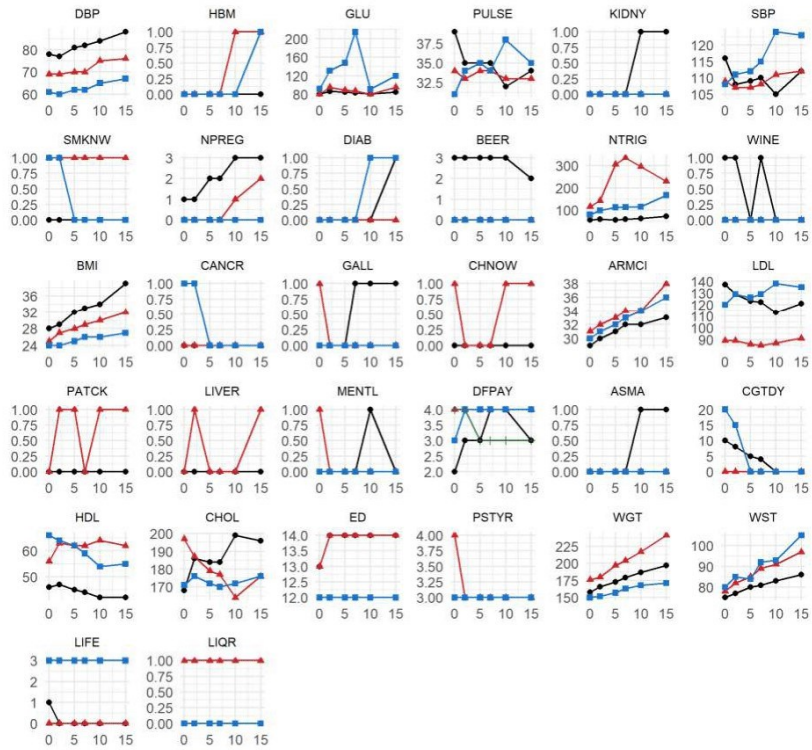

### White participants

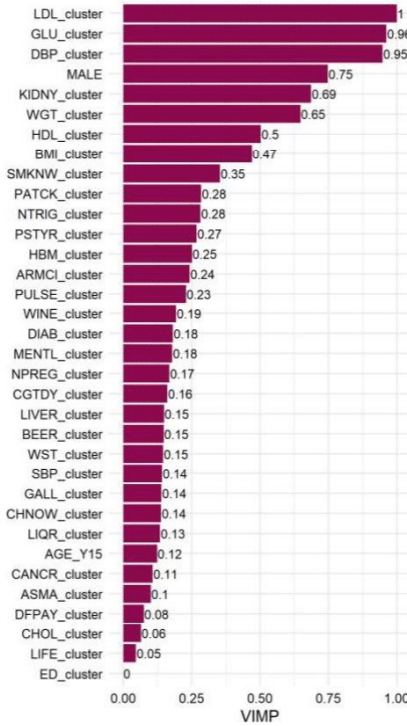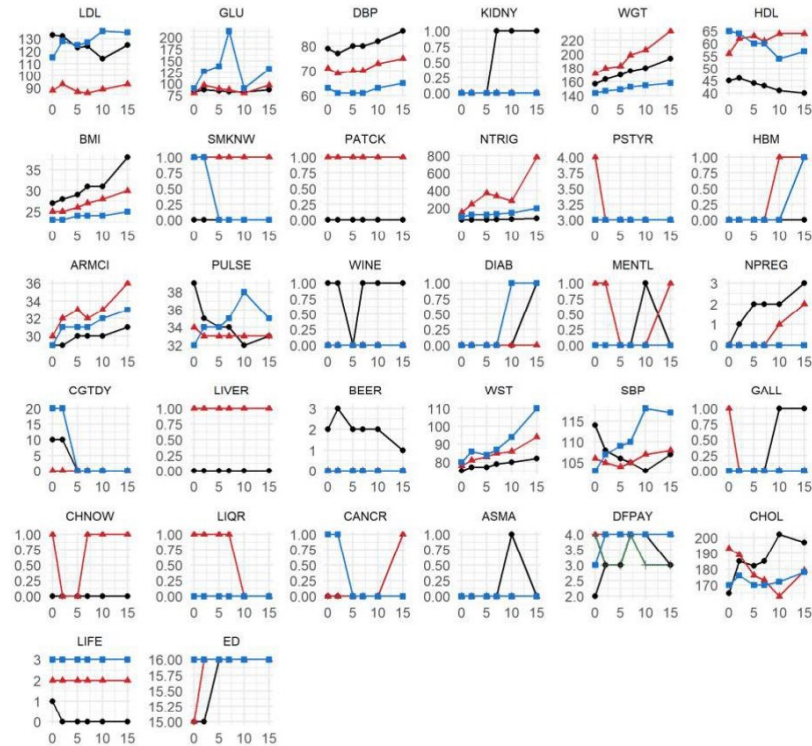

**Fig. S7:** Explanation for race-specific models of RSF trained on trajectory clustering data. Left panels: normalized median variable importance (VIMP) over 10 folds from permutation for the input variables (trajectory membership and demographic variables) of RSF on trajectory clustering data in Black participants (top) and White participants (bottom). Right panels: cluster profiles for each longitudinal variable, showing the representative (median) trajectory per cluster.
